# Supplementary material for: 3D Bioprinting of Novel κ-Carrageenan Bioinks: An Algae-Derived Polysaccharide
Source: MDPI journal article supplement (doi:10.3390/bioengineering9030109), 2022-03-06
Supplement: s1 [file s1]

# 3D Bioprinting of Novel $\kappa$ -Carrageenan Bioinks: An Algae-Derived Polysaccharide

Diana M. C. Marques <sup>1,2</sup>, João C. Silva <sup>1,2,3</sup>, Ana Paula Serro <sup>4,5</sup>, Joaquim M. S. Cabral <sup>1,2</sup>, Paola Sanjuan-Alberte <sup>1,2,6,\*</sup> and Frederico C. Ferreira <sup>1,2,\*</sup>

- <sup>1</sup> Department of Bioengineering and Institute for Bioengineering and Biosciences, Instituto Superior Técnico, Universidade de Lisboa, Av. Rovisco Pais, 1049-001 Lisbon, Portugal; diana.c.marques@tecnico.ulisboa.pt (D.M.C.M.); joao.f.da.silva@tecnico.ulisboa.pt (J.C.S.); joaquim.cabral@tecnico.ulisboa.pt (J.M.S.C.)
- <sup>2</sup> Associate Laboratory i4HB—Institute for Health and Bioeconomy, Instituto Superior Técnico, Universidade de Lisboa, Av. Rovisco Pais, 1049-001 Lisbon, Portugal
- <sup>3</sup> Centre for Rapid and Sustainable Product Development, Polytechnic of Leiria, 2430-038 Marinha Grande, Portugal
- <sup>4</sup> Centre of Structural Chemistry, Department of Chemical Engineering, Instituto Superior Técnico, Universidade de Lisboa, Av. Rovisco Pais, 1049-001 Lisbon, Portugal; anapaula.serro@tecnico.ulisboa.pt
- <sup>5</sup> Egas Moniz Interdisciplinary Research Centre, Instituto Universitario, Egas Moniz, Quinta da Granja, Monte de Caparica, 2829-511 Caparica, Portugal
- <sup>6</sup> Regenerative Medicine and Cellular Therapies, School of Pharmacy, University of Nottingham, University Park, Nottingham NG7 2RD, UK
- \* Correspondence: paola.sanjuanalbarte2@nottingham.ac.uk (P.S.-A.); frederico.ferreira@tecnico.ulisboa.pt (F.C.F.)

**Citation:** Marques, D.M.C.; Silva, J.C.; Serro, A.P.; Cabral, J.M.S.; Sanjuan-Alberte, P.; Ferreira, F.C. 3D Bioprinting of Novel  $\kappa$ -Carrageenan Bioinks: An Algae-Derived Polysaccharide. *Bioengineering* **2022**, *9*, 109. <https://doi.org/10.3390/bioengineering9030109>

Academic Editors: Chaozong Liu, Saman Naghieh, Gabriella Lindberg and Gary Chinga Carrasco

Received: 23 December 2021

Accepted: 02 March 2022

Published: 06 March 2022

**Publisher's Note:** MDPI stays neutral with regard to jurisdictional claims in published maps and institutional affiliations.

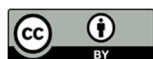

**Copyright:** © 2022 by the authors. Submitted for possible open access publication under the terms and conditions of the Creative Commons Attribution (CC BY) license (<https://creativecommons.org/licenses/by/4.0/>).

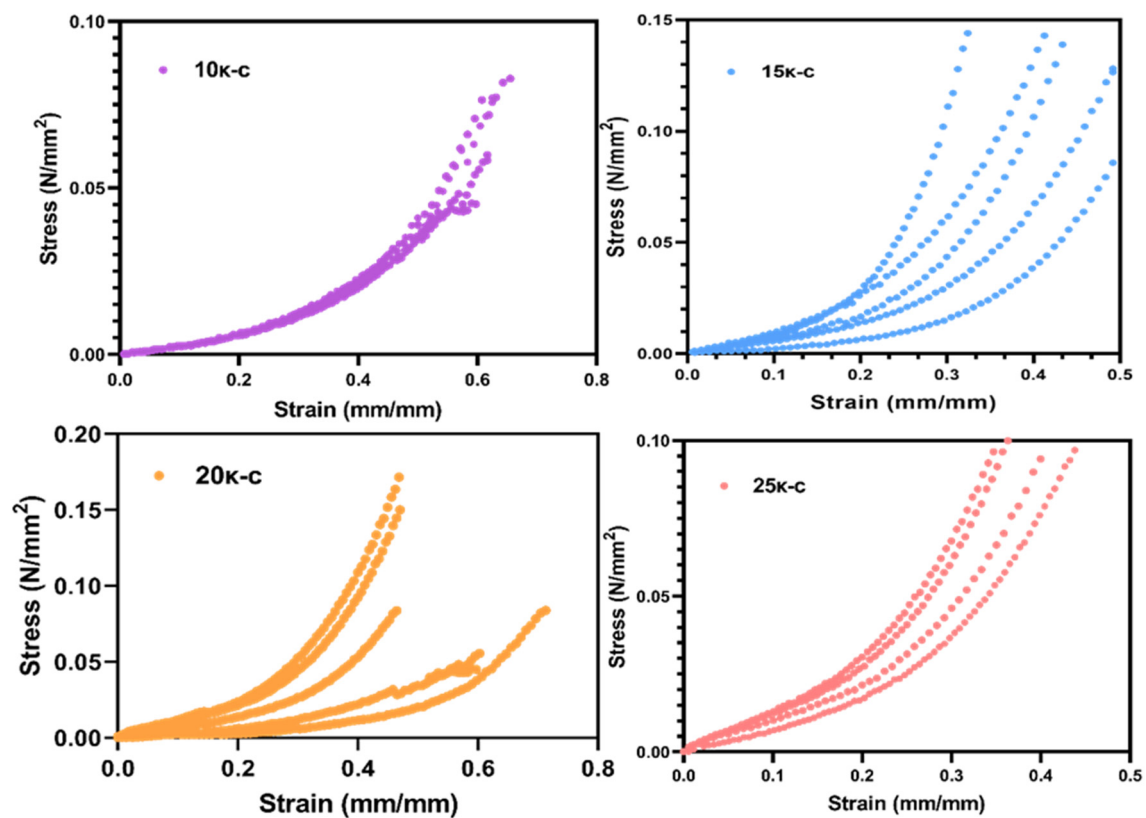

Figure S1. Stress-strain curves for the four  $\kappa$ -based inks.

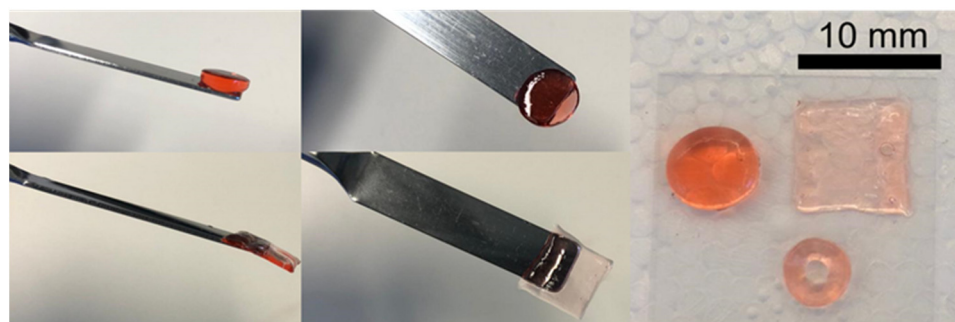

Figure S2. 3D printed structures using the 15 $\kappa$ -c ink.

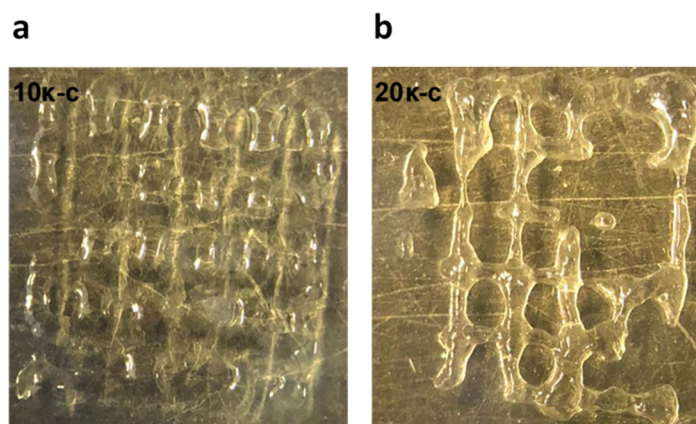

Figure S3. 3D printed squared meshes of (a) 10 $\kappa$ -c and (b) 20 $\kappa$ -c.

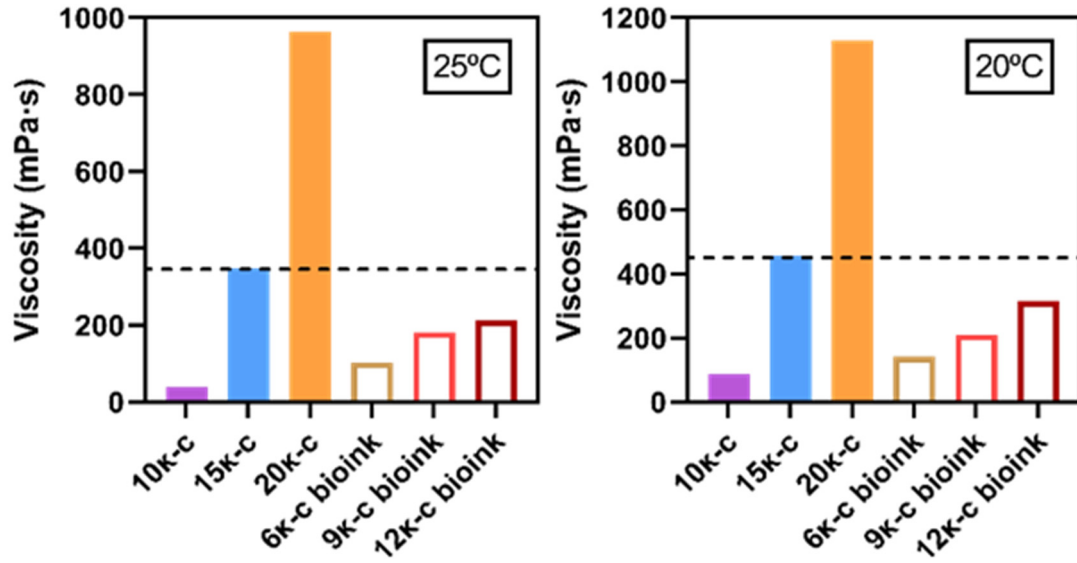

**Figure S4.** Specific viscosity of 10κ-c, 15κ-c, 20κ-c inks and 6κ-c, 9κ-c, and 12κ-c bioinks at 25°C and 20°C. Three samples were analysed in each assay ( $n=3$ ).

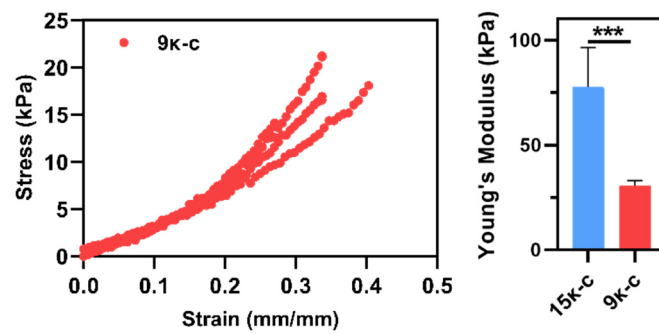

**Figure S5.** A) Stress-strain curves of 9κ-c bioink during a compression test, at room temperature, and respective B) Young modulus value comparing o the 15κ-c ink.

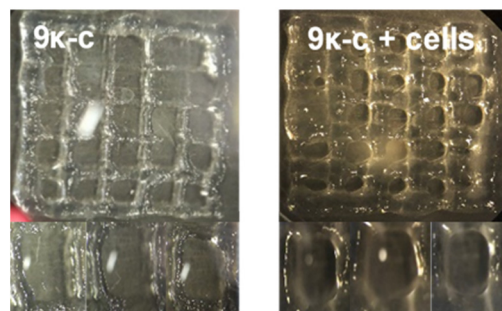

**Figure S6.** 3D bio-/printed squared meshes used in the calculation of the printability factor of 9κ-c ink and the 9κ-c bioink and higher magnification images of the pores used for this.

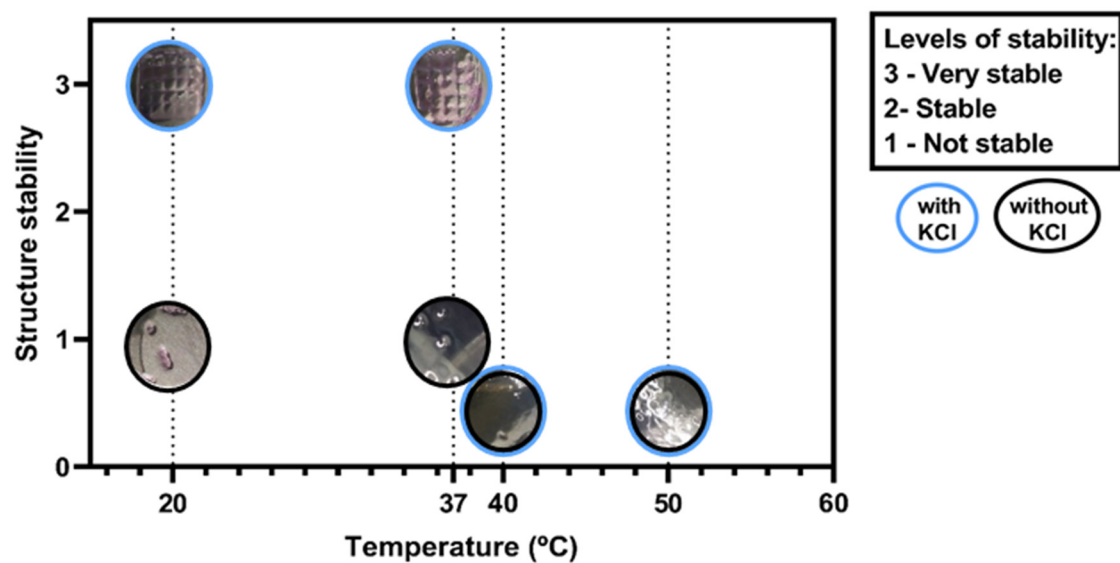

**Figure S7.** Structure stability of 3D printed 9κ-c bio-inks at different temperatures (20, 37, 40, and 50 °C), with (blue circle) or without the supplementation of KCl (black circle). Different levels were defined to describe the stability of each scaffold (3 – very stable; 2 – stable; 1 – not stable).

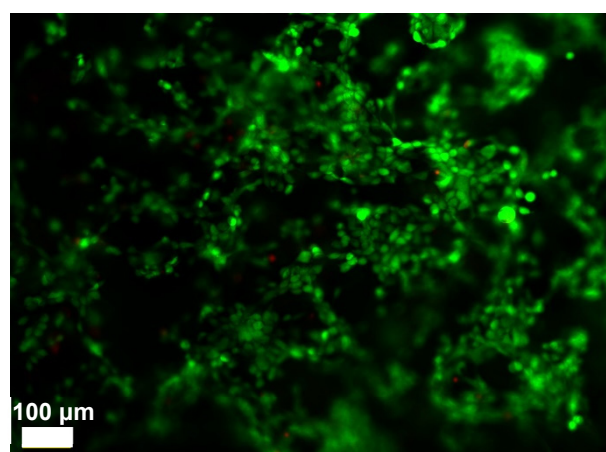

**Figure S8.** Fluorescence microscopy images of the fibroblasts encapsulated on bioprinted structures after Live/Dead staining with ethidium homodimer 1 (dead cells) and calcein-AM (viable cells).
